# Supplementary material for: A green route to silicananoparticles with tunable size and structure
Source: Royal Society of Chemistry journal article supplement (doi:10.1039/b713438j), 2007-12-14
Supplement: si-b713438j.pdf [file si-b713438j.pdf]

# **A Green Route to Silica Nanoparticles with Tunable Size and Structure**

*Yun Yang and Thibaud Coradin\**

## **Supporting information**

**SI-1** : TEM images of fragmented silica nanoparticles

**SI-2** : HR TEM images of silica nanoparticles obtained after thermal treatment

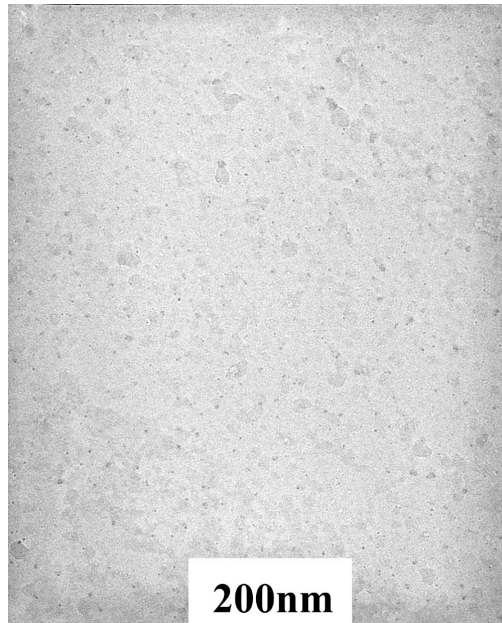

**SI-1:** TEM images of silica fragments obtained for  $[\text{SiO}_2] = 0.02 \text{ M}$  and  $[\text{alginate}] = 0.05 \text{ wt\%}$  and re-dispersion in water at  $95 \text{ }^\circ\text{C}$

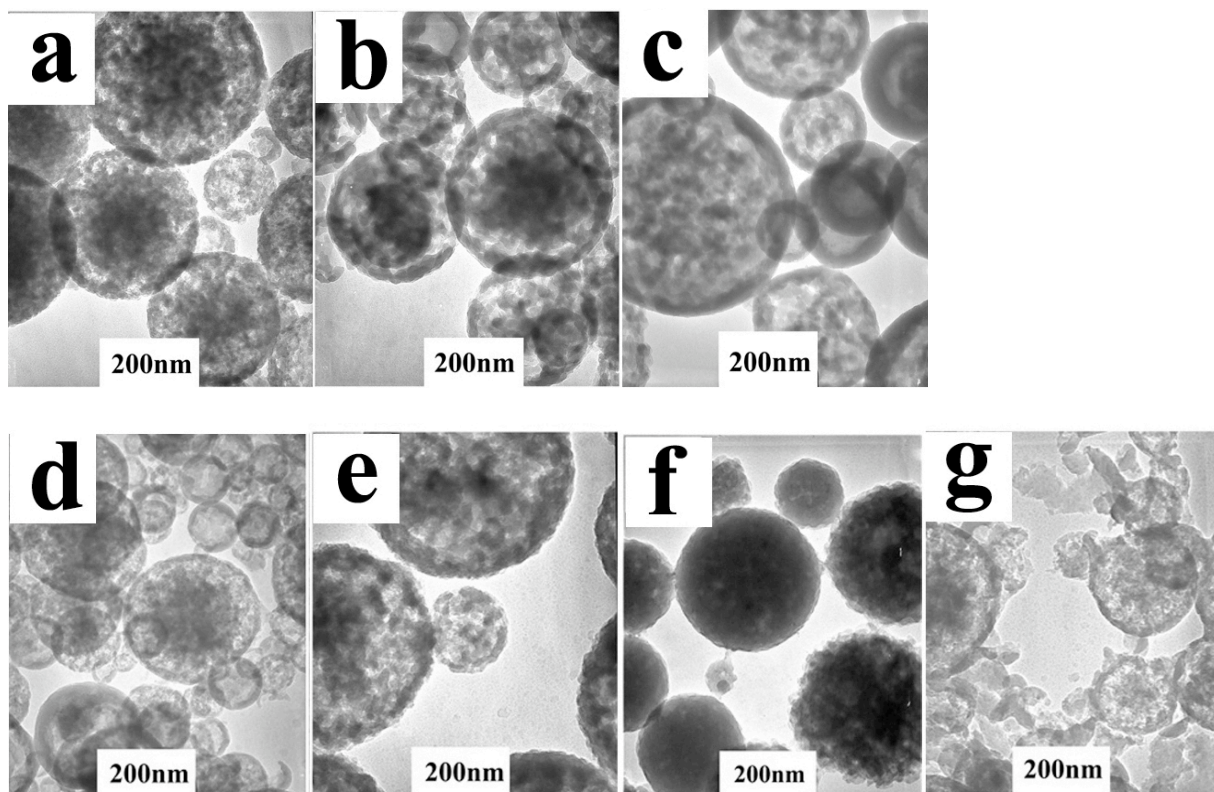

**SI-2** : HR TEM of silica nanoparticles after different thermal treatments. See Table 1 for experimental conditions
